# Supplementary material for: Growth of a large-aperture mid-infrared nonlinear optical La3Nb0.5Ga5.5O14 crystal for optical parametric chirped-pulse amplification
Source: Royal Society of Chemistry journal article supplement (doi:10.1039/d1ce00919b), 2021-01-01
Supplement: d1ce00919b1.pdf [file d1ce00919b1.pdf]

## Supplement Information

### Growth of large-aperture mid-infrared nonlinear optical $\text{La}_3\text{Nb}_{0.5}\text{Ga}_{5.5}\text{O}_{14}$ crystal for optical parametric chirped-pulse amplification

Yu-Zhou Wang,<sup>a</sup> Fei Liang<sup>a</sup>, Ji-Yang Wang<sup>a</sup>, Da-Zhi Lu<sup>\*a</sup>, Hao-Hai Yu<sup>\*a</sup> and Huai-Jin Zhang<sup>a</sup>

SI Table 1 Thermophysical properties used in the simulation

| Physical properties                                                  | Value             |
|----------------------------------------------------------------------|-------------------|
| Density of the crystal (g/cm <sup>3</sup> )                          | 5.88              |
| Emissivity of the crystal                                            | 0.3               |
| Specific heat of the crystal (J/g·k)                                 | 600               |
| Thermal conductivity of the crystal (W/m·k)                          | 1.7               |
| Density of the melt (g/cm <sup>3</sup> )                             | 5.5               |
| Specific heat of the melt (J/g·k)                                    | 800               |
| Thermal conductivity of the melt (W/m·k)                             | 1.5               |
| Thermal conductivity of the Ir crucible (W/m·k)                      | 147               |
| Emissivity of the Ir crucible                                        | 0.8               |
| Electricity conductivity of the Ir crucible (S/m)                    | 2×10 <sup>7</sup> |
| Specific heat of the Ir crucible (J/g·k)                             | 130               |
| Thermal conductivity of ZrO <sub>2</sub> brick (W/m·k)               | 3                 |
| Emissivity of ZrO <sub>2</sub>                                       | 0.6               |
| Thermal conductivity of Al <sub>2</sub> O <sub>3</sub> plate (W/m·k) | 2.5               |
| Emissivity of Al <sub>2</sub> O <sub>3</sub>                         | 0.7               |

SI Table 2 Geometric structure of different temperature fields (The thickness of heat insulators)

|                                         | (a) | (b) | (c) |
|-----------------------------------------|-----|-----|-----|
| ZrO <sub>2</sub> brick/mm               | 20  | 25  | 30  |
| ZrO <sub>2</sub> fiber blanket/mm       | 20  | 30  | 40  |
| ZrO <sub>2</sub> plate/mm               | 10  | 15  | 25  |
| Al <sub>2</sub> O <sub>3</sub> plate/mm | 10  | 15  | 25  |
